# Supplementary material for: Synthesis of polymeric topological isomers based on sequential Ugi-4CR and thiol–yne click reactions with sequence-controlled amino-functionalized polymers
Source: Royal Society of Chemistry journal article supplement (doi:10.1039/c9py01859j), 2020-01-01
Supplement: c9py01859j1.pdf [file c9py01859j1.pdf]

## Supporting Information

### Synthesis of Polymeric Topological Isomers based on Sequential Ugi-4CR and Thiol-yne Click Reactions with Sequence-Controlled Amino-Functionalized Polymers

Heyu Shen, Li Han, Hongwei Ma\*, Pibo Liu, Lincan Yang, Chao Li, Yuting Ma, Zhixuan Peng, Yang Li

*State Key Laboratory of Fine Chemicals, Department of Polymer Science and Engineering, Liaoning key Laboratory of Polymer Science and Engineering, School of Chemical Engineering, Dalian University of Technology, Dalian 116024, China*

\*E-mail: mahw@dlut.edu.cn;

## Experimental section

**Synthesis of Monomers.** The preparation of Ugi-DPE, I-[4-[N,N-Bis(trimethylsilyl)amino]phenyl]-I-phenylethylene, used as the copolymerization monomer was reported in the previous work.<sup>1</sup>

**In Situ <sup>1</sup>H NMR Kinetics Studies of the Copolymerization of St/Ugi-DPE.** The in situ <sup>1</sup>H NMR kinetics studies of the St/Ugi-DPE copolymerization in a 4/1 feed ratio was provided as an example for illustration. Ugi-DPE (0.08 g, 0.24 mmol) was dissolved in benzene-d<sub>6</sub> (1.8 ml) and initiated by Sec-BuLi (0.35 mol/L, 0.07 mL) under glovebox conditions. After 30 min, St (0.1 g, 0.96 mmol) was added to the reaction mixture and stirred well quickly. Next, the polymeric solution was transferred to a sealed NMR tube for in situ <sup>1</sup>H NMR. The first spectrum was used for confirming the specific amounts of all components. To monitor the reaction by in situ <sup>1</sup>H

NMR, all spectra were recorded at 400 MHz with four scans and a time interval between each measurement of 1 min. The experimentation did not terminated until the peaks of vinyl almost disappeared.

**Synthesis of sequence-controlled in-chain amino-functionalized base polymers.** In previous researches<sup>2-9</sup>, the sequence-defined polymers could be synthesized by the copolymerization of St and DPE derivatives due to the unique feature of DPE derivatives. Furthermore, the sequence and number of DPE units in copolymerization were controlled by the feed ratio. In this work, two sequence-controlled polymers with similar number of Ugi-DPE units but with different sequence patterns were synthesized. According to different feed molar ratios of St/Ugi-DPE, the copolymers were named U4 (St/Ugi-DPE=4/1) and U10 (St/Ugi-DPE=10/1), respectively. The experimental process of U4 was described below. The living anionic polymerization experiment was carried out in a glovebox under high purity argon atmosphere. First, Ugi-DPE (0.733 g, 2.16 mmol) was dissolved in benzene and added in a sealed bottle. Sec-BuLi (0.35 mol/L, 0.48 mL) was then injected to initiate Ugi-DPE. After 30 min, St (0.9 g, 8.65 mmol) was injected quickly into the wine red reaction mixture. Subsequently, the color of polymeric solution showed orange red, which meant that the active species turned from Ugi-DPE to St. The polymerization was accomplished in 10 wt% benzene at 25°C for 24 h. The experimental process of U10 was the same as U4 except in different feed ratio. The productions were terminated with degassed isopropanol, precipitated with excess methanol and subsequently dissolved in THF, which was repeated twice until the residual Ugi-DPE was completely removed. The amino- functionalized base polymers (N4/N10) could be de synthesized by the deprotection of U4/U10. Deprotection of U4/U10 was effected by dissolving

the polymers in dry THF solution of TBAF and stirring at 25 °C for 12 h under argon. The molar ratio of TBAF and amino groups in polymer chains was 2/1. Then the polymers were precipitated with excess methanol. The polymers were then dried under vacuum at room temperature.

## Measurements

Size exclusion chromatographic (SEC) analyses of U4/U10 and N4/N10 were performed on a Waters HPLC component system (2414 refractive index detector) at a flow rate of 1.0 mL/min in THF at 30 °C after calibration by polystyrene standard polymers.

Size exclusion chromatographic (SEC) analyses of exam-grafted polymers and corresponding alkynyl functionalized backbones and thiol terminated branches were performed on a Viscotek TDA-305 GPC (Viscotek Corp., Houston, TX) equipped with tetra-detectors [refractive index (RI), UV, viscosity(VISC), and two-angle laser light scattering (7° and 90°, laser wavelength,  $\lambda$  = 670 nm)] and two separation columns (Malvern, T6000 M $\times$ 2), PS sample (Viscotek Corp.  $M_w$  = 104.071 kg/mol,  $M_n$  = 100.967 kg/mol) was used to calibrate the instrument. THF was used as the mobile phase at a flow rate of 1.0 mL/min and the column temperature of 35 °C. The samples were dissolved in THF with the concentrations of less than 2.0 mg/mL, depending on the precise concentration injected to characterize the composition of polymers precisely.

<sup>1</sup>H-NMR spectra were recorded on a Bruker Avance II 400M NMR spectrometer at ambient temperature using CDCl<sub>3</sub> (tetramethylsilane, TMS) as the solvent.

Matrix-assisted laser desorption/ionization time of flight mass spectrometry (MALDI-TOF

MS) analysis was carried out on a Waters MALDI micro MX mass spectrometer. 2-[(2E)-3-(4-tert-butylphenyl)-2-methylprop-2-enylidene]malonitrile (DCTB) and sodium trifluoro-acetate were used as dopants for PS-SH-2400, while silver acetate were used as dopants for PS-SH-4800.

The small-angle X-ray scattering (SAXS) experiments were carried out with the Bruker Microcalix. The incident beam had a wavelength of  $\lambda = 0.154$  nm. The evaluated  $q$  range was  $0.08 \sim 3 \text{ nm}^{-1}$ .

Necessary corrections were made include absorption correction and deducting background of toluene solvent. Quartz capillary with diameter of 1mm were used as sample containers. The samples were prepared in toluene with polymer concentrations at 0.2 wt%.

## Additional data

Table S1. Characteristic of the copolymers of St/Ugi-DPE

| Run | $[M_S]_0/[M_D]_0$ | $N_S/N_D^a$ | $M_n$ (kg/mol) <sup>b</sup> | $M_w/M_n^b$ |
|-----|-------------------|-------------|-----------------------------|-------------|
| U4  | 4.0               | 4.2         | 7.5                         | 1.14        |
| U10 | 10.0              | 9.6         | 18.4                        | 1.10        |

a) The ratio of St/Ugi-DPE in chain ( $N_S/N_D$ ) was calculated by  $^1\text{H}$  NMR. b) Determined by SEC on a Waters HPLC component system

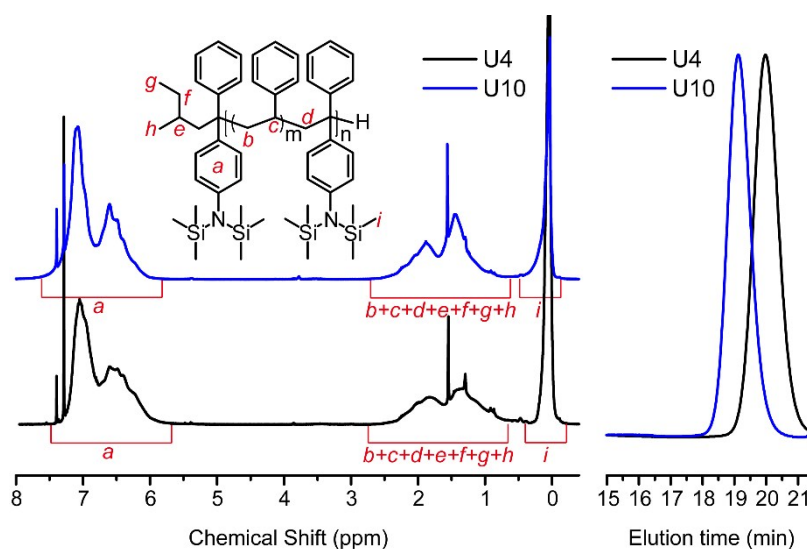

Figure S1.  $^1\text{H}$  NMR spectra and SEC curves of the copolymers of St/Ugi-DPE

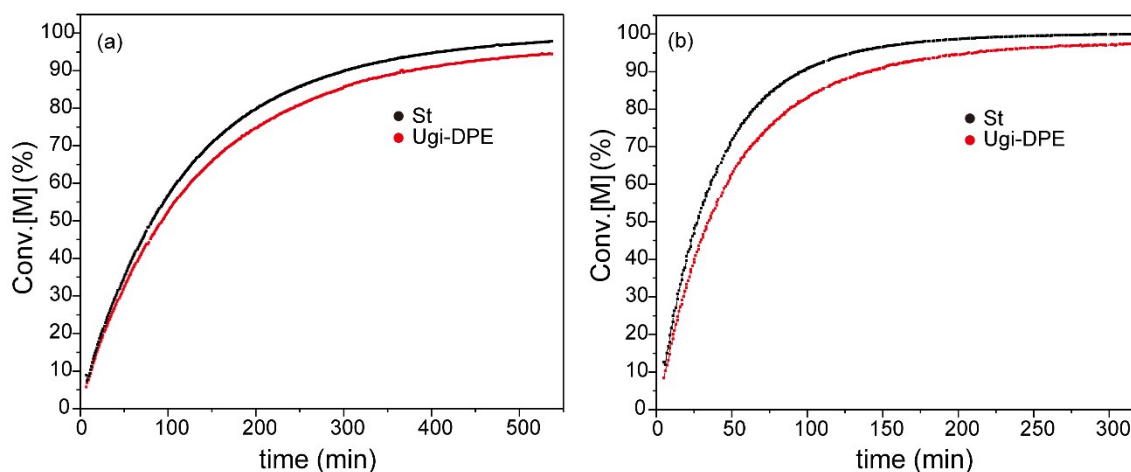

Figure S2. Conversion curves of the copolymerization of St and Ugi-DPE: (a)  $[\text{St}]_0/[\text{Ugi-DPE}]_0=4:1$ , (b)  $[\text{St}]_0/[\text{Ugi-DPE}]_0=10:1$

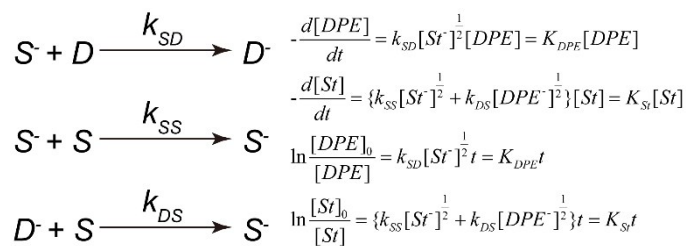

Scheme S1. Chain propagation elementary reaction and kinetic equations of copolymerization

of St and Ugi-DPE

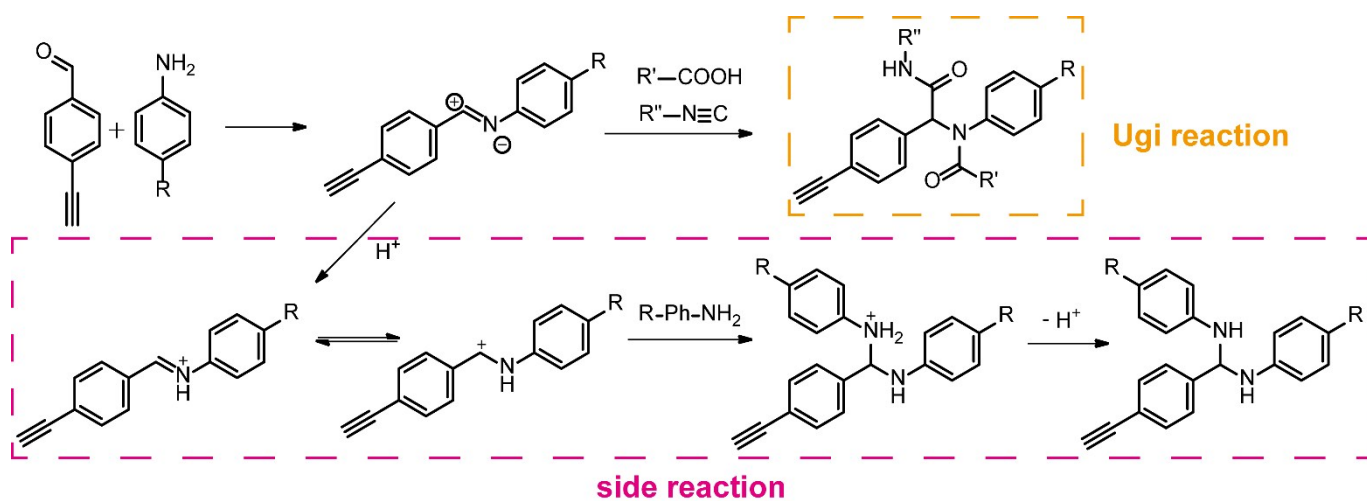

Scheme S2. Potential side reaction mechanism.

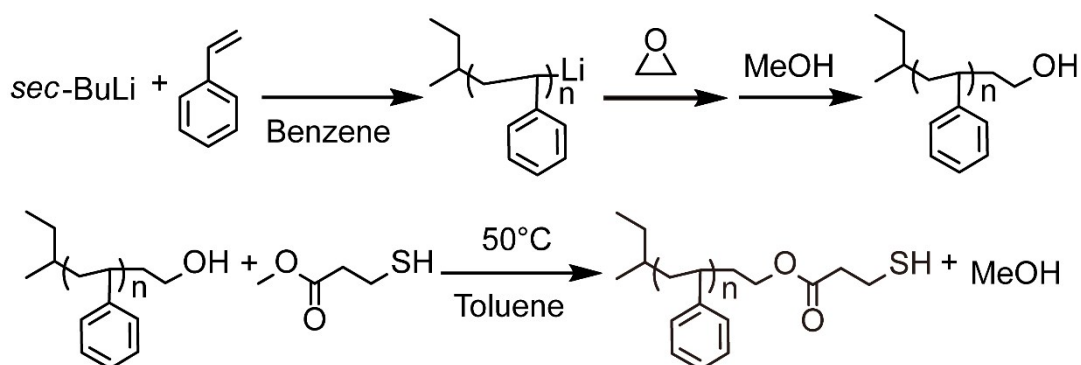

Scheme S3. Synthetic route for thiol-terminated polystyrene.

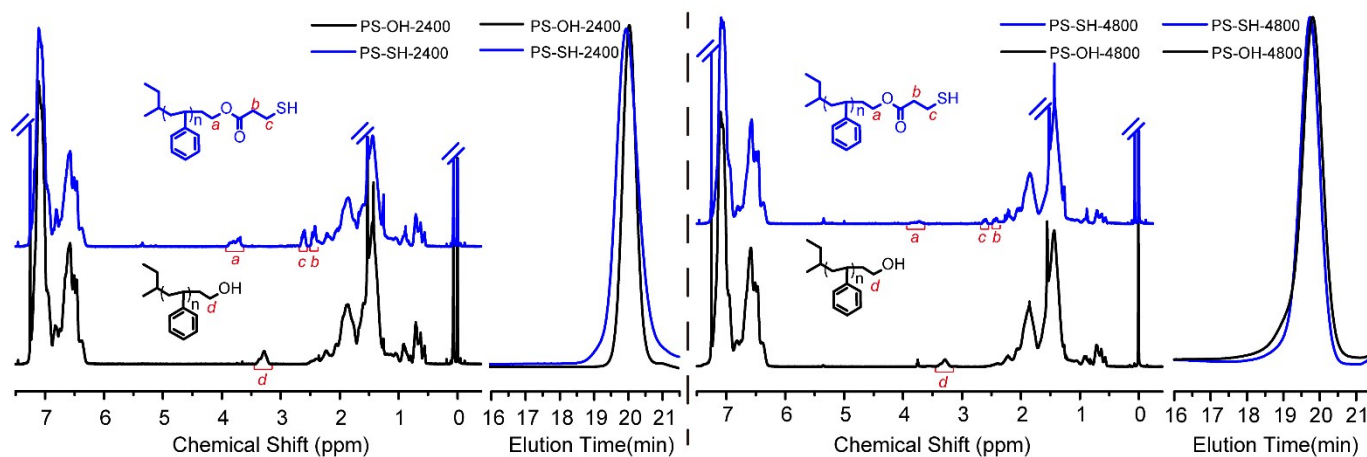

Figure S3.  $^1\text{H}$  NMR spectra and SEC curves of the hydroxyl-terminated polystyrenes and corresponding thiol-terminated polystyrenes

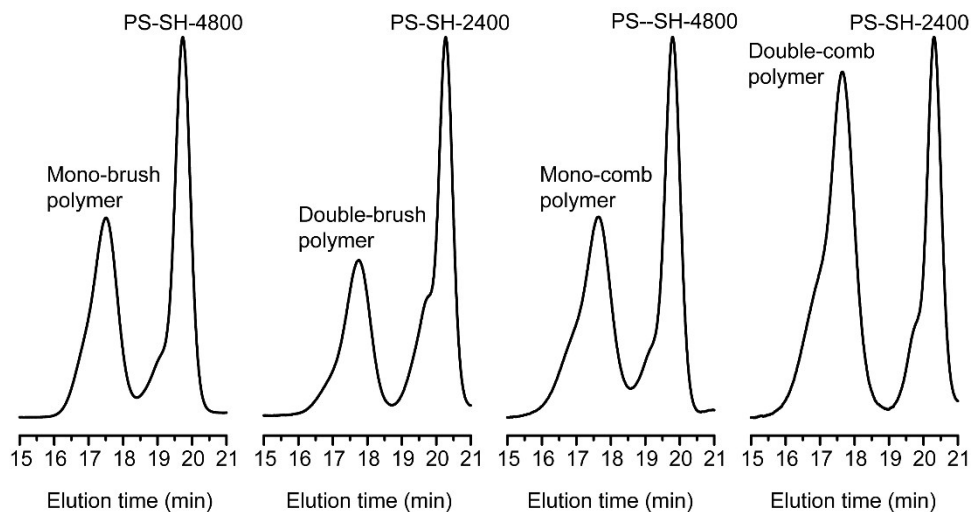

Figure S4. SEC curves of grafted polymers before fraction

Table S2. Architectural parameters of the sequence-controlled backbones

| Run                   | $M_n^a$  | $M_w/M_n^a$ | $R_n^a$ | $T_g^b$ |
|-----------------------|----------|-------------|---------|---------|
|                       | (kg/mol) |             | (nm)    | (°C)    |
| Mono-brush backbone   | 23.8     | 1.08        | 3.18    | 154     |
| Double-brush backbone | 18.6     | 1.45        | 3.45    | 165     |
| Mono-comb backbone    | 26.1     | 1.18        | 3.76    | 138     |
| Double-comb backbone  | 32.7     | 1.37        | 4.17    | 135     |

a) Determined by SEC with tetra-detectors. b)  $T_g$  was characterized by DSC.

Table S3.  $dn/dc$  of the polymeric components for well-defined grafted polymers

| Run                   | dn/dc  |
|-----------------------|--------|
| N4                    | 0.2042 |
| Mono-brush backbone   | 0.1697 |
| Double-brush backbone | 0.1663 |
| Mono-brush polymer    | 0.1885 |
| Double-brush polymer  | 0.1730 |
| N10                   | 0.2350 |
| Mono-comb backbone    | 0.2052 |
| Double-comb backbone  | 0.1786 |
| Mono-comb polymer     | 0.2487 |
| Double-comb polymer   | 0.2105 |
| PS-SH-2400            | 0.1712 |
| PS-SH-4800            | 0.1680 |

1. Shen, H.; Ma, H.; Liu, P.; Huang, W.; Han, L.; Li, C.; Li, Y. Facile Synthesis of In-Chain, Multicomponent, Functionalized Polymers via Living Anionic Copolymerization through the Ugi Four-Component Reaction (Ugi-4CR). *Macromol. Rapid Commun.* **2017**, 38 (18).
2. Liu, P.; Ma, H. W.; Huang, W.; Han, L.; Hao, X. Y.; Shen, H. Y.; Bai, Y.; Li, Y. Sequence regulation in the living anionic copolymerization of styrene and 1-(4-dimethylaminophenyl)-1-phenylethylene by modification with different additives. *Polym. Chem.* **2017**, 8 (11), 1778-1789.
3. Liu, P. B.; Ma, H. W.; Huang, W.; Shen, H. Y.; Wu, L. L.; Li, Y.; Wang, Y. R. The determination of sequence distribution in the living anionic copolymerization of styrene and strong electron-donating DPE derivative-1,1-bis(4-N,N-dimethylanilino)phenyl)ethylene. *Polymer* **2016**, 97, 167-173.
4. Sang, W.; Ma, H. W.; Wang, Q. Y.; Hao, X. Y.; Zheng, Y. B.; Wang, Y. R.; Li, Y. Monomer sequence determination in the living anionic copolymerization of styrene and asymmetric bi-functionalized 1,1-diphenylethylene derivatives. *Polym. Chem.* **2016**, 7 (1), 219-234.
5. Wang, Q. Y.; Ma, H. W.; Sang, W.; Han, L.; Liu, P. B.; Shen, H. Y.; Huang, W.; Gong, X. C.; Yang, L. C.; Wang, Y. R.; Li, Y. Synthesis of sequence-determined bottlebrush polymers based on sequence determination in living anionic copolymerization of styrene and dimethyl(4-(1-phenylvinyl)phenyl) silane. *Polym. Chem.* **2016**, 7 (18), 3090-3099.



6. Yang, L. C.; Ma, H. W.; Han, L.; Hao, X. Y.; Liu, P. B.; Shen, H. Y.; Li, Y. Synthesis of a sequence-controlled in-chain alkynyl/tertiary amino dual-functionalized terpolymer via living anionic polymerization. *Polym. Chem.* **2018**, *9* (1), 108-120.
7. Ma, H. W.; Han, L.; Li, Y. Sequence Determination and Regulation in the Living Anionic Copolymerization of Styrene and 1,1-Diphenylethylene (DPE) Derivatives. *Macromol. Chem. Phys.* **2017**, 218 (12).
8. Huang, W.; Ma, H. W.; Han, L.; Liu, P. B.; Yang, L. C.; Shen, H. Y.; Hao, X. Y.; Li, Y. Synchronous Regulation of Periodicity and Monomer Sequence during Living Anionic Copolymerization of Styrene and Dimethyl-[4-(1-phenylvinyl)phenyl]silane (DPE-SiH). *Macromolecules* **2018**, *51* (10), 3746-3757.
9. Yang, L. C.; Ma, H. W.; Han, L.; Liu, P. B.; Shen, H. Y.; Li, C.; Li, Y. Sequence Features of Sequence-Controlled Polymers Synthesized by 1,1-Diphenylethylene Derivatives with Similar Reactivity during Living Anionic Polymerization. *Macromolecules* **2018**, *51* (15), 5891-5903.
